# Supplementary material for: Experimental Hybrids of the Triatoma brasiliensis Species Complex Show Higher Susceptibility to the Trypanosoma cruzi Infection Than Their Parentals
Source: MDPI journal article supplement (doi:10.3390/microorganisms11122850), 2023-11-24
Supplement: s1 [file s1]

Supplementary Table S1- Blood intake(mg) and parasitic density found in the specimens examined on the 10<sup>th</sup>, 20<sup>th</sup> and 30<sup>th</sup> days after the T.cruzi infection

| Specimens                      | Days after the infection |                     |             |                     |            |                     |
|--------------------------------|--------------------------|---------------------|-------------|---------------------|------------|---------------------|
|                                | 10                       |                     | 20          |                     | 30         |                     |
|                                | Weight (mg)              | Parasites           | Weight (mg) | Parasites           | Weight(mg) | Parasites           |
| HybridsHbj                     | 230                      | 14x10 <sup>5</sup>  | 200         | 7x10 <sup>5</sup>   | 157        | 1x10 <sup>5</sup>   |
|                                | 116                      | 27x10 <sup>5</sup>  | 95          | 8x10 <sup>5</sup>   | 113        | 2x10 <sup>5</sup>   |
|                                | 227                      | 21x10 <sup>5</sup>  | 162         | 7x10 <sup>5</sup>   | 91         | 4x10 <sup>5</sup>   |
|                                | 197                      | 20x10 <sup>5</sup>  | 141         | 21x10 <sup>5</sup>  | 127        | 9x10 <sup>5</sup>   |
|                                | 344                      | 20x10 <sup>5</sup>  | 216         | 5x10 <sup>5</sup>   | 128        | 7x10 <sup>5</sup>   |
|                                | 107                      | 24x10 <sup>5</sup>  | 364         | 5x10 <sup>5</sup>   | 225        | 4x10 <sup>5</sup>   |
|                                | 150                      | 36x10 <sup>5</sup>  | 283         | 21x10 <sup>5</sup>  | 108        | 10x10 <sup>5</sup>  |
|                                | 391                      | 23x10 <sup>5</sup>  | 332         | 6x10 <sup>5</sup>   | 75         | 3x10 <sup>5</sup>   |
|                                | 296                      | 22x10 <sup>5</sup>  | 117         | 24x10 <sup>5</sup>  | 162        | 2x10 <sup>5</sup>   |
|                                | 154                      | 14x10 <sup>5</sup>  | 228         | 2x10 <sup>5</sup>   | 111        | 7x10 <sup>5</sup>   |
| HybridsHjb                     | 480                      | 7x10 <sup>5</sup>   | 110         | 10x10 <sup>5</sup>  | 177        | 0,5x10 <sup>5</sup> |
|                                | 334                      | 30x10 <sup>5</sup>  | 127         | 23x10 <sup>5</sup>  | 123        | 13x10 <sup>5</sup>  |
|                                | 121                      | 18x10 <sup>5</sup>  | 535         | 12x10 <sup>5</sup>  | 111        | 18x10 <sup>5</sup>  |
|                                | 235                      | 15x10 <sup>5</sup>  | 125         | 0,8x10 <sup>5</sup> | 155        | 10x10 <sup>5</sup>  |
|                                | 262                      | 14x10 <sup>5</sup>  | 291         | 1x10 <sup>5</sup>   | 196        | 1x10 <sup>5</sup>   |
|                                | 116                      | 11x10 <sup>5</sup>  | 108         | 7x10 <sup>5</sup>   | 65         | 8x10 <sup>5</sup>   |
|                                | 134                      | 9x10 <sup>5</sup>   | 48          | 11x10 <sup>5</sup>  | 209        | 3x10 <sup>5</sup>   |
|                                | 124                      | 14x10 <sup>5</sup>  | 153         | 28x10 <sup>5</sup>  | 228        | 2x10 <sup>5</sup>   |
|                                | 257                      | 27x10 <sup>5</sup>  | 438         | 10x10 <sup>5</sup>  | 20         | 0,1x10 <sup>5</sup> |
|                                | 242                      | 17x10 <sup>5</sup>  | 302         | 33x10 <sup>5</sup>  | 155        | 32x10 <sup>5</sup>  |
| <i>Triatoma juazeirensis</i>   | 43                       | 11x10 <sup>5</sup>  | 83          | 12x10 <sup>5</sup>  | 205        | 12x10 <sup>5</sup>  |
|                                | 123                      | 0                   | 94          | 1x10 <sup>5</sup>   | 396        | 20x10 <sup>5</sup>  |
|                                | 146                      | 0,3x10 <sup>5</sup> | 109         | 2x10 <sup>5</sup>   | 102        | 24x10 <sup>5</sup>  |
|                                | 163                      | 2x10 <sup>5</sup>   | 140         | 2x10 <sup>5</sup>   | 177        | 82x10 <sup>5</sup>  |
|                                | 164                      | 18x10 <sup>5</sup>  | 141         | 9x10 <sup>5</sup>   | 89         | 0,8x10 <sup>5</sup> |
|                                | 239                      | 43x10 <sup>5</sup>  | 159         | 17x10 <sup>5</sup>  | 257        | 2x10 <sup>5</sup>   |
|                                | 295                      | 6x10 <sup>5</sup>   | 218         | 6x10 <sup>5</sup>   | 149        | 3x10 <sup>5</sup>   |
|                                | 328                      | 0,6x10 <sup>5</sup> | 278         | 2x10 <sup>5</sup>   | 152        | 47x10 <sup>5</sup>  |
|                                | 390                      | 9x10 <sup>5</sup>   | 328         | 2x10 <sup>5</sup>   | 160        | 16x10 <sup>5</sup>  |
|                                | 213                      | 97x10 <sup>5</sup>  | 336         | 2x10 <sup>5</sup>   | 142        | 28x10 <sup>5</sup>  |
| <i>Triatomab. brasiliensis</i> | 220                      | 49x10 <sup>5</sup>  | 707         | 27x10 <sup>5</sup>  | 241        | 4x10 <sup>5</sup>   |
|                                | 209                      | 38x10 <sup>5</sup>  | 345         | 6x10 <sup>5</sup>   | 307        | 5x10 <sup>5</sup>   |
|                                | 140                      | 80x10 <sup>5</sup>  | 297         | 3x10 <sup>5</sup>   | 363        | 7x10 <sup>5</sup>   |
|                                | 75                       | 48x10 <sup>5</sup>  | 286         | 4x10 <sup>5</sup>   | 128        | 3x10 <sup>5</sup>   |
|                                | 202                      | 50x10 <sup>5</sup>  | 410         | 6x10 <sup>5</sup>   | 170        | 10x10 <sup>5</sup>  |
|                                | 311                      | 43x10 <sup>5</sup>  | 184         | 1x10 <sup>5</sup>   | 383        | 3x10 <sup>5</sup>   |
|                                | 100                      | 10x10 <sup>5</sup>  | 410         | 5x10 <sup>5</sup>   | 480        | 8x10 <sup>5</sup>   |
|                                | 101                      | 36x10 <sup>5</sup>  | 59          | 2x10 <sup>5</sup>   | 375        | 6x10 <sup>5</sup>   |
|                                | 92                       | 28x10 <sup>5</sup>  | 125         | 4x10 <sup>5</sup>   | 297        | 25x10 <sup>5</sup>  |
|                                | 140                      | 28x10 <sup>5</sup>  | 219         | 2x10 <sup>5</sup>   | 320        | 6x10 <sup>5</sup>   |

Supplementary Table S2-

| Numbers of parasites |               |              |                 |           |         |
|----------------------|---------------|--------------|-----------------|-----------|---------|
| Group                | epimastigotes | transitional | tripomastigotes | day       | segment |
| HJB -1               | 337500        | 50000        | 62500           | <b>10</b> | stomach |
| HJB -2               | 2725000       | 87500        | 0               | 10        | stomach |
| HJB-3                | 1400000       | 137500       | 50000           | 10        | stomach |
| HJB-4                | 1037500       | 212500       | 75000           | 10        | stomach |
| HJB-5                | 1100000       | 87500        | 62500           | 10        | stomach |
| HJB-6                | 787500        | 62500        | 87500           | 10        | stomach |
| HJB-7                | 525000        | 25000        | 100000          | 10        | stomach |
| HJB-8                | 975000        | 62500        | 50000           | 10        | stomach |
| HJB-9                | 2100000       | 112500       | 225000          | 10        | stomach |
| HJB-10               | 1262500       | 62500        | 75000           | 10        | stomach |
| HBJ-1                | 712500        | 200000       | 0               | 10        | stomach |
| HBJ-2                | 1875000       | 425000       | 37500           | 10        | stomach |
| HBJ-3                | 1300000       | 125000       | 125000          | 10        | stomach |
| HBJ-4                | 1187500       | 175000       | 87500           | 10        | stomach |
| HBJ-5                | 1487500       | 87500        | 62500           | 10        | stomach |
| HBJ-6                | 1475000       | 62500        | 137500          | 10        | stomach |
| HBJ-7                | 2750000       | 187500       | 425000          | 10        | stomach |
| HBJ-8                | 1537500       | 150000       | 125000          | 10        | stomach |
| HBJ-9                | 1762500       | 150000       | 125000          | 10        | stomach |
| HBJ-10               | 987500        | 37500        | 37500           | 10        | stomach |
| BRA-1                | 3825000       | 225000       | 0               | 10        | stomach |
| BRA-2                | 3225000       | 200000       | 0               | 10        | stomach |
| BRA-3                | 0             | 0            | 0               | 10        | stomach |
| BRA-4                | 2900000       | 175000       | 50000           | 10        | stomach |
| BRA-5                | 4250000       | 375000       | 175000          | 10        | stomach |
| BRA-6                | 3900000       | 150000       | 175000          | 10        | stomach |
| BRA-7                | 825000        | 100000       | 0               | 10        | stomach |
| BRA-8                | 2975000       | 200000       | 0               | 10        | stomach |
| BRA-9                | 2400000       | 100000       | 0               | 10        | stomach |
| BRA-10               | 2175000       | 175000       | 75000           | 10        | stomach |
| JUAZ-1               | 0             | 0            | 0               | 10        | stomach |
| JUAZ-2               | 0             | 0            | 0               | 10        | stomach |
| JUAZ-3               | 0             | 0            | 0               | 10        | stomach |
| JUAZ-4               | 150000        | 50000        | 0               | 10        | stomach |
| JUAZ-5               | 825000        | 150000       | 0               | 10        | stomach |
| JUAZ-6               | 1575000       | 275000       | 0               | 10        | stomach |
| JUAZ-7               | 0             | 0            | 0               | 10        | stomach |
| JUAZ-8               | 0             | 0            | 0               | 10        | stomach |
| JUAZ-9               | 425000        | 100000       | 50000           | 10        | stomach |
| JUAZ-10              | 8600000       | 875000       | 125000          | 10        | stomach |

|         |         |        |        |    |           |
|---------|---------|--------|--------|----|-----------|
| HJB -1  | 167500  | 12500  | 20000  | 10 | intestine |
| HJB -2  | 72500   | 5000   | 5000   | 10 | intestine |
| HJB-3   | 62500   | 7500   | 7500   | 10 | intestine |
| HJB-4   | 187500  | 22500  | 7500   | 10 | intestine |
| HJB-5   | 30000   | 2500   | 2500   | 10 | intestine |
| HJB-6   | 97500   | 17500  | 15000  | 10 | intestine |
| HJB-7   | 215000  | 30000  | 25000  | 10 | intestine |
| HJB-8   | 135000  | 12500  | 12500  | 10 | intestine |
| HJB-9   | 185000  | 22500  | 17500  | 10 | intestine |
| HJB-10  | 292500  | 15000  | 10000  | 10 | intestine |
| HBJ-1   | 375000  | 42500  | 0      | 10 | intestine |
| HBJ-2   | 105000  | 25000  | 17500  | 10 | intestine |
| HBJ-3   | 302500  | 87500  | 137500 | 10 | intestine |
| HBJ-4   | 292500  | 35000  | 155000 | 10 | intestine |
| HBJ-5   | 282500  | 17500  | 62500  | 10 | intestine |
| HBJ-6   | 262500  | 10000  | 65000  | 10 | intestine |
| HBJ-7   | 132500  | 7500   | 42500  | 10 | intestine |
| HBJ-8   | 160000  | 0      | 32500  | 10 | intestine |
| HBJ-9   | 92500   | 27500  | 12500  | 10 | intestine |
| HBJ-10  | 260000  | 15000  | 42500  | 10 | intestine |
| BRA-1   | 720000  | 45000  | 0      | 10 | intestine |
| BRA-2   | 325000  | 25000  | 0      | 10 | intestine |
| BRA-3   | 750000  | 50000  | 0      | 10 | intestine |
| BRA-4   | 1412500 | 60000  | 0      | 10 | intestine |
| BRA-5   | 147500  | 17500  | 0      | 10 | intestine |
| BRA-6   | 50000   | 5000   | 0      | 10 | intestine |
| BRA-7   | 57500   | 10000  | 0      | 10 | intestine |
| BRA-8   | 307500  | 37500  | 0      | 10 | intestine |
| BRA-9   | 312500  | 17500  | 0      | 10 | intestine |
| BRA-10  | 365000  | 35000  | 0      | 10 | intestine |
| JUAZ-1  | 912500  | 125000 | 35000  | 10 | intestine |
| JUAZ-2  | 0       | 0      | 0      | 10 | intestine |
| JUAZ-3  | 0       | 0      | 0      | 10 | intestine |
| JUAZ-4  | 15000   | 2500   | 0      | 10 | intestine |
| JUAZ-5  | 750000  | 50000  | 25000  | 10 | intestine |
| JUAZ-6  | 2325000 | 75000  | 0      | 10 | intestine |
| JUAZ-7  | 530000  | 57500  | 2500   | 10 | intestine |
| JUAZ-8  | 52500   | 10000  | 0      | 10 | intestine |
| JUAZ-9  | 307500  | 20000  | 2500   | 10 | intestine |
| JUAZ-10 | 62500   | 5000   | 2500   | 10 | intestine |
| HJB -1  | 82500   | 0      | 7500   | 10 | rectum    |
| HJB -2  | 80000   | 5000   | 12500  | 10 | rectum    |
| HJB-3   | 77500   | 5000   | 7500   | 10 | rectum    |
| HJB-4   | 2500    | 0      | 0      | 10 | rectum    |

|         |         |        |        |           |         |
|---------|---------|--------|--------|-----------|---------|
| HJB-5   | 92500   | 10000  | 10000  | 10        | rectum  |
| HJB-6   | 7500    | 0      | 7500   | 10        | rectum  |
| HJB-7   | 10000   | 2500   | 0      | 10        | rectum  |
| HJB-8   | 140000  | 12500  | 12500  | 10        | rectum  |
| HJB-9   | 0       | 0      | 0      | 10        | rectum  |
| HJB-10  | 7500    | 5000   | 0      | 10        | rectum  |
| HBJ-1   | 32500   | 10000  | 0      | 10        | rectum  |
| HBJ-2   | 160000  | 32500  | 7500   | 10        | rectum  |
| HBJ-3   | 10000   | 0      | 5000   | 10        | rectum  |
| HBJ-4   | 22500   | 0      | 0      | 10        | rectum  |
| HBJ-5   | 37500   | 2500   | 7500   | 10        | rectum  |
| HBJ-6   | 320000  | 15000  | 17500  | 10        | rectum  |
| HBJ-7   | 52500   | 2500   | 7500   | 10        | rectum  |
| HBJ-8   | 205000  | 70000  | 7500   | 10        | rectum  |
| HBJ-9   | 0       | 0      | 0      | 10        | rectum  |
| HBJ-10  | 12500   | 0      | 5000   | 10        | rectum  |
| BRA-1   | 47500   | 2500   | 0      | 10        | rectum  |
| BRA-2   | 0       | 0      | 0      | 10        | rectum  |
| BRA-3   | 2500    | 0      | 0      | 10        | rectum  |
| BRA-4   | 225000  | 0      | 0      | 10        | rectum  |
| BRA-5   | 0       | 0      | 0      | 10        | rectum  |
| BRA-6   | 10000   | 0      | 0      | 10        | rectum  |
| BRA-7   | 15000   | 7500   | 0      | 10        | rectum  |
| BRA-8   | 52500   | 5000   | 0      | 10        | rectum  |
| BRA-9   | 0       | 0      | 0      | 10        | rectum  |
| BRA-10  | 5000    | 0      | 0      | 10        | rectum  |
| JUAZ-1  | 0       | 0      | 0      | 10        | rectum  |
| JUAZ-2  | 0       | 0      | 0      | 10        | rectum  |
| JUAZ-3  | 27500   | 2500   | 0      | 10        | rectum  |
| JUAZ-4  | 0       | 0      | 0      | 10        | rectum  |
| JUAZ-5  | 0       | 0      | 0      | 10        | rectum  |
| JUAZ-6  | 0       | 0      | 0      | 10        | rectum  |
| JUAZ-7  | 7500    | 0      | 0      | 10        | rectum  |
| JUAZ-8  | 0       | 0      | 0      | 10        | rectum  |
| JUAZ-9  | 0       | 0      | 0      | 10        | rectum  |
| JUAZ-10 | 10000   | 0      | 0      | 10        | rectum  |
| HJB -1  | 537500  | 162500 | 50000  | <b>20</b> | stomach |
| HJB -2  | 1662500 | 62500  | 212500 | 20        | stomach |
| HJB-3   | 712500  | 112500 | 62500  | 20        | stomach |
| HJB-4   | 50000   | 0      | 0      | 20        | stomach |
| HJB-5   | 25000   | 12500  | 0      | 20        | stomach |
| HJB-6   | 112500  | 162500 | 0      | 20        | stomach |
| HJB-7   | 812500  | 112500 | 37500  | 20        | stomach |
| HJB-8   | 1250000 | 425000 | 400000 | 20        | stomach |

|         |         |        |        |    |           |
|---------|---------|--------|--------|----|-----------|
| HJB-9   | 400000  | 212500 | 212500 | 20 | stomach   |
| HJB-10  | 2175000 | 25000  | 25000  | 20 | stomach   |
| HBJ-1   | 362500  | 87500  | 0      | 20 | stomach   |
| HBJ-2   | 150000  | 62500  | 0      | 20 | stomach   |
| HBJ-3   | 112500  | 0      | 12500  | 20 | stomach   |
| HBJ-4   | 1287500 | 175000 | 400000 | 20 | stomach   |
| HBJ-5   | 62500   | 25000  | 0      | 20 | stomach   |
| HBJ-6   | 200000  | 50000  | 25000  | 20 | stomach   |
| HBJ-7   | 1625000 | 112500 | 125000 | 20 | stomach   |
| HBJ-8   | 200000  | 87500  | 12500  | 20 | stomach   |
| HBJ-9   | 1250000 | 187500 | 275000 | 20 | stomach   |
| HBJ-10  | 0       | 0      | 0      | 20 | stomach   |
| BRA-1   | 375000  | 175000 | 25000  | 20 | stomach   |
| BRA-2   | 7500    | 2500   | 0      | 20 | stomach   |
| BRA-3   | 7500    | 2500   | 0      | 20 | stomach   |
| BRA-4   | 112500  | 22500  | 0      | 20 | stomach   |
| BRA-5   | 417500  | 32500  | 25000  | 20 | stomach   |
| BRA-6   | 0       | 0      | 0      | 20 | stomach   |
| BRA-7   | 150000  | 67500  | 0      | 20 | stomach   |
| BRA-8   | 27500   | 2500   | 0      | 20 | stomach   |
| BRA-9   | 172500  | 45000  | 0      | 20 | stomach   |
| BRA-10  | 0       | 0      | 0      | 20 | stomach   |
| JUAZ-1  | 37500   | 0      | 0      | 20 | stomach   |
| JUAZ-2  | 0       | 0      | 0      | 20 | stomach   |
| JUAZ-3  | 0       | 0      | 0      | 20 | stomach   |
| JUAZ-4  | 0       | 0      | 0      | 20 | stomach   |
| JUAZ-5  | 112500  | 50000  | 0      | 20 | stomach   |
| JUAZ-6  | 25000   | 0      | 0      | 20 | stomach   |
| JUAZ-7  | 0       | 0      | 0      | 20 | stomach   |
| JUAZ-8  | 0       | 0      | 0      | 20 | stomach   |
| JUAZ-9  | 0       | 0      | 0      | 20 | stomach   |
| JUAZ-10 | 0       | 0      | 0      | 20 | stomach   |
| HJB -1  | 250000  | 12500  | 25000  | 20 | intestine |
| HJB -2  | 245000  | 12500  | 87500  | 20 | intestine |
| HJB-3   | 162500  | 45000  | 12500  | 20 | intestine |
| HJB-4   | 12500   | 2500   | 0      | 20 | intestine |
| HJB-5   | 47500   | 2500   | 10000  | 20 | intestine |
| HJB-6   | 332500  | 102500 | 10000  | 20 | intestine |
| HJB-7   | 97500   | 2500   | 27500  | 20 | intestine |
| HJB-8   | 377500  | 37500  | 50000  | 20 | intestine |
| HJB-9   | 77500   | 5000   | 10000  | 20 | intestine |
| HJB-10  | 157500  | 15000  | 55000  | 20 | intestine |
| HBJ-1   | 202500  | 17500  | 12500  | 20 | intestine |
| HBJ-2   | 205000  | 12500  | 50000  | 20 | intestine |

|         |         |        |        |    |           |
|---------|---------|--------|--------|----|-----------|
| HBJ-3   | 162500  | 20000  | 67500  | 20 | intestine |
| HBJ-4   | 150000  | 7500   | 17500  | 20 | intestine |
| HBJ-5   | 262500  | 12500  | 25000  | 20 | intestine |
| HBJ-6   | 117500  | 37500  | 35000  | 20 | intestine |
| HBJ-7   | 180000  | 20000  | 27500  | 20 | intestine |
| HBJ-8   | 215000  | 17500  | 27500  | 20 | intestine |
| HBJ-9   | 310000  | 10000  | 312500 | 20 | intestine |
| HBJ-10  | 105000  | 42500  | 22500  | 20 | intestine |
| BRA-1   | 2025000 | 125000 | 0      | 20 | intestine |
| BRA-2   | 400000  | 175000 | 0      | 20 | intestine |
| BRA-3   | 275000  | 0      | 0      | 20 | intestine |
| BRA-4   | 150000  | 50000  | 0      | 20 | intestine |
| BRA-5   | 132500  | 12500  | 0      | 20 | intestine |
| BRA-6   | 20000   | 0      | 0      | 20 | intestine |
| BRA-7   | 175000  | 30000  | 0      | 20 | intestine |
| BRA-8   | 77500   | 12500  | 0      | 20 | intestine |
| BRA-9   | 132500  | 27500  | 5000   | 20 | intestine |
| BRA-10  | 42500   | 7500   | 0      | 20 | intestine |
| JUAZ-1  | 775000  | 112500 | 0      | 20 | intestine |
| JUAZ-2  | 105000  | 10000  | 2500   | 20 | intestine |
| JUAZ-3  | 137500  | 25000  | 0      | 20 | intestine |
| JUAZ-4  | 200000  | 50000  | 0      | 20 | intestine |
| JUAZ-5  | 650000  | 150000 | 0      | 20 | intestine |
| JUAZ-6  | 1550000 | 125000 | 0      | 20 | intestine |
| JUAZ-7  | 450000  | 100000 | 0      | 20 | intestine |
| JUAZ-8  | 187500  | 0      | 0      | 20 | intestine |
| JUAZ-9  | 175000  | 50000  | 0      | 20 | intestine |
| JUAZ-10 | 75000   | 12500  | 0      | 20 | intestine |
| HJB -1  | 0       | 0      | 0      | 20 | rectum    |
| HJB -2  | 27500   | 0      | 0      | 20 | rectum    |
| HJB-3   | 37500   | 10000  | 10000  | 20 | rectum    |
| HJB-4   | 15000   | 2500   | 0      | 20 | rectum    |
| HJB-5   | 27500   | 2500   | 10000  | 20 | rectum    |
| HJB-6   | 2500    | 7500   | 0      | 20 | rectum    |
| HJB-7   | 7500    | 0      | 12500  | 20 | rectum    |
| HJB-8   | 197500  | 27500  | 12500  | 20 | rectum    |
| HJB-9   | 47500   | 10000  | 12500  | 20 | rectum    |
| HJB-10  | 460000  | 35000  | 352500 | 20 | rectum    |
| HBJ-1   | 35000   | 5000   | 10000  | 20 | rectum    |
| HBJ-2   | 222500  | 20000  | 35000  | 20 | rectum    |
| HBJ-3   | 247500  | 22500  | 75000  | 20 | rectum    |
| HBJ-4   | 52500   | 5000   | 0      | 20 | rectum    |
| HBJ-5   | 100000  | 12500  | 17500  | 20 | rectum    |
| HBJ-6   | 27500   | 5000   | 20000  | 20 | rectum    |

|         |        |        |       |           |         |
|---------|--------|--------|-------|-----------|---------|
| HBJ-7   | 12500  | 0      | 5000  | 20        | rectum  |
| HBJ-8   | 57500  | 10000  | 0     | 20        | rectum  |
| HBJ-9   | 5000   | 2500   | 0     | 20        | rectum  |
| HBJ-10  | 0      | 0      | 0     | 20        | rectum  |
| BRA-1   | 12500  | 0      | 0     | 20        | rectum  |
| BRA-2   | 5000   | 2500   | 0     | 20        | rectum  |
| BRA-3   | 22500  | 0      | 0     | 20        | rectum  |
| BRA-4   | 17500  | 7500   | 0     | 20        | rectum  |
| BRA-5   | 27500  | 2500   | 0     | 20        | rectum  |
| BRA-6   | 87500  | 10000  | 0     | 20        | rectum  |
| BRA-7   | 80000  | 10000  | 0     | 20        | rectum  |
| BRA-8   | 77500  | 12500  | 0     | 20        | rectum  |
| BRA-9   | 27500  | 10000  | 0     | 20        | rectum  |
| BRA-10  | 142500 | 27500  | 7500  | 20        | rectum  |
| JUAZ-1  | 200000 | 35000  | 12500 | 20        | rectum  |
| JUAZ-2  | 30000  | 5000   | 0     | 20        | rectum  |
| JUAZ-3  | 25000  | 0      | 0     | 20        | rectum  |
| JUAZ-4  | 0      | 0      | 0     | 20        | rectum  |
| JUAZ-5  | 0      | 0      | 0     | 20        | rectum  |
| JUAZ-6  | 0      | 0      | 0     | 20        | rectum  |
| JUAZ-7  | 70000  | 12500  | 0     | 20        | rectum  |
| JUAZ-8  | 55000  | 10000  | 0     | 20        | rectum  |
| JUAZ-9  | 20000  | 7500   | 0     | 20        | rectum  |
| JUAZ-10 | 50000  | 17500  | 0     | 20        | rectum  |
| HJB -1  | 0      | 0      | 0     | <b>30</b> | stomach |
| HJB -2  | 0      | 0      | 0     | 30        | stomach |
| HJB-3   | 0      | 0      | 0     | 30        | stomach |
| HJB-4   | 0      | 0      | 0     | 30        | stomach |
| HJB-5   | 7500   | 0      | 0     | 30        | stomach |
| HJB-6   | 5000   | 0      | 0     | 30        | stomach |
| HJB-7   | 2500   | 0      | 0     | 30        | stomach |
| HJB-8   | 12500  | 0      | 0     | 30        | stomach |
| HJB-9   | 0      | 0      | 0     | 30        | stomach |
| HJB-10  | 12500  | 37500  | 0     | 30        | stomach |
| HBJ-1   | 0      | 0      | 0     | 30        | stomach |
| HBJ-2   | 0      | 0      | 0     | 30        | stomach |
| HBJ-3   | 75000  | 150000 | 25000 | 30        | stomach |
| HBJ-4   | 0      | 0      | 0     | 30        | stomach |
| HBJ-5   | 150000 | 25000  | 0     | 30        | stomach |
| HBJ-6   | 50000  | 0      | 0     | 30        | stomach |
| HBJ-7   | 50000  | 0      | 25000 | 30        | stomach |
| HBJ-8   | 0      | 0      | 0     | 30        | stomach |
| HBJ-9   | 0      | 25000  | 0     | 30        | stomach |
| HBJ-10  | 0      | 0      | 25000 | 30        | stomach |

|         |         |        |        |    |           |
|---------|---------|--------|--------|----|-----------|
| BRA-1   | 0       | 0      | 0      | 30 | stomach   |
| BRA-2   | 0       | 0      | 0      | 30 | stomach   |
| BRA-3   | 112500  | 25000  | 0      | 30 | stomach   |
| BRA-4   | 0       | 0      | 0      | 30 | stomach   |
| BRA-5   | 150000  | 37500  | 0      | 30 | stomach   |
| BRA-6   | 0       | 0      | 0      | 30 | stomach   |
| BRA-7   | 75000   | 0      | 0      | 30 | stomach   |
| BRA-8   | 0       | 0      | 0      | 30 | stomach   |
| BRA-9   | 550000  | 25000  | 0      | 30 | stomach   |
| BRA-10  | 50000   | 0      | 0      | 30 | stomach   |
| JUAZ-1  | 15000   | 5000   | 0      | 30 | stomach   |
| JUAZ-2  | 1225000 | 400000 | 0      | 30 | stomach   |
| JUAZ-3  | 1625000 | 575000 | 0      | 30 | stomach   |
| JUAZ-4  | 575000  | 75000  | 0      | 30 | stomach   |
| JUAZ-5  | 37500   | 0      | 0      | 30 | stomach   |
| JUAZ-6  | 125000  | 0      | 0      | 30 | stomach   |
| JUAZ-7  | 12500   | 0      | 0      | 30 | stomach   |
| JUAZ-8  | 37500   | 0      | 12500  | 30 | stomach   |
| JUAZ-9  | 12500   | 0      | 0      | 30 | stomach   |
| JUAZ-10 | 25000   | 0      | 0      | 30 | stomach   |
| HJB -1  | 15000   | 15000  | 0      | 30 | intestine |
| HJB -2  | 235000  | 32500  | 35000  | 30 | intestine |
| HJB-3   | 642500  | 475000 | 725000 | 30 | intestine |
| HJB-4   | 337500  | 275000 | 250000 | 30 | intestine |
| HJB-5   | 100000  | 0      | 0      | 30 | intestine |
| HJB-6   | 717500  | 22500  | 25000  | 30 | intestine |
| HJB-7   | 155000  | 7500   | 12500  | 30 | intestine |
| HJB-8   | 100000  | 50000  | 0      | 30 | intestine |
| HJB-9   | 5000    | 0      | 0      | 30 | intestine |
| HJB-10  | 3050000 | 125000 | 0      | 30 | intestine |
| HBJ-1   | 15000   | 0      | 5000   | 30 | intestine |
| HBJ-2   | 7500    | 5000   | 0      | 30 | intestine |
| HBJ-3   | 160000  | 17500  | 5000   | 30 | intestine |
| HBJ-4   | 447500  | 15000  | 32500  | 30 | intestine |
| HBJ-5   | 410000  | 85000  | 20000  | 30 | intestine |
| HBJ-6   | 55000   | 7500   | 7500   | 30 | intestine |
| HBJ-7   | 700000  | 25000  | 50000  | 30 | intestine |
| HBJ-8   | 200000  | 22500  | 7500   | 30 | intestine |
| HBJ-9   | 145000  | 12500  | 5000   | 30 | intestine |
| HBJ-10  | 475000  | 75000  | 50000  | 30 | intestine |
| BRA-1   | 32500   | 7500   | 2500   | 30 | intestine |
| BRA-2   | 357500  | 52500  | 0      | 30 | intestine |
| BRA-3   | 400000  | 75000  | 25000  | 30 | intestine |
| BRA-4   | 157500  | 15000  | 15000  | 30 | intestine |



|         |         |        |        |    |           |
|---------|---------|--------|--------|----|-----------|
| BRA-5   | 637500  | 87500  | 0      | 30 | intestine |
| BRA-6   | 155000  | 35000  | 0      | 30 | intestine |
| BRA-7   | 525000  | 75000  | 50000  | 30 | intestine |
| BRA-8   | 247500  | 20000  | 37500  | 30 | intestine |
| BRA-9   | 1525000 | 175000 | 50000  | 30 | intestine |
| BRA-10  | 262500  | 37500  | 0      | 30 | intestine |
| JUAZ-1  | 77500   | 10000  | 0      | 30 | intestine |
| JUAZ-2  | 295000  | 75000  | 0      | 30 | intestine |
| JUAZ-3  | 177500  | 27500  | 2500   | 30 | intestine |
| JUAZ-4  | 6725000 | 125000 | 700000 | 30 | intestine |
| JUAZ-5  | 17500   | 5000   | 0      | 30 | intestine |
| JUAZ-6  | 5000    | 0      | 2500   | 30 | intestine |
| JUAZ-7  | 225000  | 0      | 0      | 30 | intestine |
| JUAZ-8  | 3150000 | 975000 | 150000 | 30 | intestine |
| JUAZ-9  | 1550000 | 50000  | 0      | 30 | intestine |
| JUAZ-10 | 2225000 | 275000 | 50000  | 30 | intestine |
| HJB -1  | 15000   | 2500   | 0      | 30 | rectum    |
| HJB -2  | 985000  | 0      | 20000  | 30 | rectum    |
| HJB-3   | 0       | 0      | 0      | 30 | rectum    |
| HJB-4   | 80000   | 40000  | 5000   | 30 | rectum    |
| HJB-5   | 0       | 2500   | 0      | 30 | rectum    |
| HJB-6   | 32500   | 5000   | 35000  | 30 | rectum    |
| HJB-7   | 137500  | 0      | 12500  | 30 | rectum    |
| HJB-8   | 15000   | 0      | 2500   | 30 | rectum    |
| HJB-9   | 7500    | 5000   | 0      | 30 | rectum    |
| HJB-10  | 5000    | 0      | 0      | 30 | rectum    |
| HBJ-1   | 45000   | 15000  | 35000  | 30 | rectum    |
| HBJ-2   | 177500  | 20000  | 22500  | 30 | rectum    |
| HBJ-3   | 0       | 0      | 0      | 30 | rectum    |
| HBJ-4   | 365000  | 20000  | 27500  | 30 | rectum    |
| HBJ-5   | 10000   | 0      | 2500   | 30 | rectum    |
| HBJ-6   | 210000  | 35000  | 15000  | 30 | rectum    |
| HBJ-7   | 117500  | 15000  | 5000   | 30 | rectum    |
| HBJ-8   | 30000   | 2500   | 17500  | 30 | rectum    |
| HBJ-9   | 0       | 0      | 0      | 30 | rectum    |
| HBJ-10  | 87500   | 15000  | 25000  | 30 | rectum    |
| BRA-1   | 275000  | 30000  | 32500  | 30 | rectum    |
| BRA-2   | 32500   | 7500   | 5000   | 30 | rectum    |
| BRA-3   | 100000  | 0      | 7500   | 30 | rectum    |
| BRA-4   | 72500   | 0      | 5000   | 30 | rectum    |
| BRA-5   | 65000   | 20000  | 0      | 30 | rectum    |
| BRA-6   | 90000   | 12500  | 0      | 30 | rectum    |
| BRA-7   | 62500   | 12500  | 27500  | 30 | rectum    |
| BRA-8   | 250000  | 75000  | 0      | 30 | rectum    |

|         |        |        |        |    |        |
|---------|--------|--------|--------|----|--------|
| BRA-9   | 122500 | 27500  | 12500  | 30 | rectum |
| BRA-10  | 170000 | 17500  | 22500  | 30 | rectum |
| JUAZ-1  | 847500 | 120000 | 105000 | 30 | rectum |
| JUAZ-2  | 0      | 0      | 0      | 30 | rectum |
| JUAZ-3  | 0      | 0      | 0      | 30 | rectum |
| JUAZ-4  | 17500  | 0      | 0      | 30 | rectum |
| JUAZ-5  | 20000  | 2500   | 2500   | 30 | rectum |
| JUAZ-6  | 27500  | 0      | 0      | 30 | rectum |
| JUAZ-7  | 40000  | 0      | 0      | 30 | rectum |
| JUAZ-8  | 342500 | 40000  | 5000   | 30 | rectum |
| JUAZ-9  | 32500  | 2500   | 0      | 30 | rectum |
| JUAZ-10 | 195000 | 5000   | 5000   | 30 | rectum |
